# Supplementary material
Source: publisher figshare collection journal article supplement (https://frontiersin.figshare.com/ndownloader/files/23638616)
Supplement: Supplementary file 1 [file 23638616]

## *Supplementary Material*

### SM1 Literature overview

Table S1.1 Overview of land-use literature combining ABM and optimization approaches

| <b>Paper</b>                           | <b>Context</b>     | <b>Model types</b>                                          | <b>Model coupling</b>                                                                                       | <b>Policy instruments?</b> | <b>Purpose of the study</b>                                                                                           |
|----------------------------------------|--------------------|-------------------------------------------------------------|-------------------------------------------------------------------------------------------------------------|----------------------------|-----------------------------------------------------------------------------------------------------------------------|
| Arentze et al. (2010)                  | urban planning     | agent-based model (ABM)                                     | optimization heuristic built into ABM                                                                       | No                         | To generate land-use-plan alternatives for supporting scenario building as a part of a decision process               |
| Hartig and Drechsler (2010)            | agriculture        | ABM                                                         | optimization within ABM as “perfect coordination”                                                           | Yes                        | To analyse the functioning of simple spatial incentives in market-based conservation instruments                      |
| Ligmann-Zielinska and Jankowski (2010) | urban planning     | ABM, multi-objective optimization (MOLA)                    | MOLA results using a zoning constraints for ABM                                                             | No                         | To develop solutions for planners and developers in respect to residential land use                                   |
| Li et al. (2011)                       | urban planning     | cellular automata (CA), ant-colony optimization (ACO)       | ACO-optimization with input from CA                                                                         | No                         | To assist in identifying the optimal path for a planned expressway                                                    |
| Yuan et al. (2014)                     | land-use planning  | multi-agent system (MAS), genetic algorithm (GA)-based MOLA | agent-based landscape configurations fed into MOLA for optimization with agent’s preferences as constraints | Not explicitly             | To generate optimal land-use configurations that improve the economic output, spatial compactness, and carbon storage |
| Widener et al. (2015)                  | disaster relief    | ABM, spatial optimization model                             | optimization based on ABM-generated spatial pattern of households                                           | No                         | To explore various scenarios during a hurricane event, including strategies for emergency services                    |
| Brunner et al. (2016)                  | mountain landscape | ABM                                                         | normative scenarios approximated by means of ABM                                                            | Yes                        | To infer land-use policy strategies for matching regional ES supply and demand                                        |
| Christley et al. (2016)                | conceptual         | ABM, optimal control model                                  | control functions at individual level in ABM to “guide” it                                                  | Yes                        | To maximize total taxes collected while minimizing the impact of taxation on the                                      |

Supplementary Material

|                         |                              |                                                                        |                                                                  |                   |                                                                                                               |
|-------------------------|------------------------------|------------------------------------------------------------------------|------------------------------------------------------------------|-------------------|---------------------------------------------------------------------------------------------------------------|
|                         |                              |                                                                        | towards optimum                                                  |                   | population over a finite time                                                                                 |
| Haslauer et al. (2016)  | land-use planning            | ABM, backcasting model                                                 | stepwise backcasting from scenario endpoint                      | No                | To support spatial planning by suggesting necessary steps for achievement of (desired) future goal            |
| Zhang et al. (2016)     | (urban) land-use planning    | particle swarm optimization (PSO)-based MOLA, MAS                      | multi-stage decision rules of agents with iterative optimization | Yes (centralized) | To achieve optimal multi-objective land-use allocation (in terms of quality, space and time) in urban context |
| Whittaker et al. (2017) | agri-environmental policy    | Soil and Water Assessment Tool (SWAT), Data Envelopment Analysis (DEA) | bilevel evolutionary optimization                                | Yes               | To evaluate an agri-environmental policy and to increase its effectiveness                                    |
| Qiu et al. (2018)       | urban                        | ABM/CA, spatial GA                                                     | ABM-generated land demand fed into multi-objective optimization  | No                | To simulate urban land development and population dynamics                                                    |
| Chen et al. (2018)      | urban                        | ABM, CA                                                                | ABM-generated ecological constraints fed into CA of urban growth | No                | To develop and explore planning scenarios related to urban growth boundaries (UGBs)                           |
| Kim et al. (2018)       | agriculture (biomass supply) | process-based crop model, ABM, optimization engine                     | optimization over data generated by combining ABM & crop model   | No                | To find the best locations for biomass storage facilities (at the country scale)                              |
| Mo et al. (2018)        | multiple (technology choice) | ABM, system dynamics model, spatial optimization                       | optimal scenario guiding modelling to develop realistic scenario | Yes               | Conceptual                                                                                                    |

Arentze, T.A., Borgers, A.W.J., Ma, L., Timmermans, H.J.P., 2010. An Agent-Based Heuristic Method for Generating Land-Use Plans in Urban Planning. *Environ. Plan. B Plan. Des.* 37, 463–482. <https://doi.org/10.1068/b35050>

Brunner, S.H., Huber, R., Grêt-Regamey, A., 2016. A backcasting approach for matching regional ecosystem services supply and demand. *Environ. Model. Softw.* 75, 439–458. <https://doi.org/10.1016/j.envsoft.2015.10.018>

Chen, Y., Li, X., Liu, X., Huang, H., Ma, S., 2019. Simulating urban growth boundaries using a

- patch-based cellular automaton with economic and ecological constraints. *Int. J. Geogr. Inf. Sci.* 33, 55–80. <https://doi.org/10.1080/13658816.2018.1514119>
- Christley, S., Neilan, R.M., Oremland, M., Salinas, R., Lenhart, S., 2017. Optimal control of sugarscape agent-based model via a PDE approximation model. *Optim. Control Appl. Methods* 38, 473–497. <https://doi.org/10.1002/oca.2265>
- Hartig, F., Drechsler, M., 2010. Stay by thy neighbor? Social organization determines the efficiency of biodiversity markets with spatial incentives. *Ecol. Complex.* 7, 91–99. <https://doi.org/10.1016/j.ecocom.2009.07.001>
- Haslauer, E., Biberacher, M., Blaschke, T., 2016. A spatially explicit backcasting approach for sustainable land-use planning. *J. Environ. Plan. Manag.* 59, 866–890. <https://doi.org/10.1080/09640568.2015.1044652>
- Kim, Sojung, Kim, Sumin, Kiniry, J.R., 2018. Two-phase simulation-based location-allocation optimization of biomass storage distribution. *Simul. Model. Pract. Theory* 86, 155–168. <https://doi.org/10.1016/j.simpat.2018.05.006>
- Li, X., 2011. Emergence of bottom-up models as a tool for landscape simulation and planning. *Landsc. Urban Plan.* 100, 393–395. <https://doi.org/10.1016/j.landurbplan.2010.11.016>
- Ligmann-Zielinska, A., Jankowski, P., 2010. Exploring normative scenarios of land use development decisions with an agent-based simulation laboratory. *Comput. Environ. Urban Syst.* 34, 409–423. <https://doi.org/10.1016/j.compenvurbsys.2010.05.005>
- Mo, W., Lu, Z., Dilkina, B., Gardner, K., Huang, J.-C., Foreman, M., 2018. Sustainable and Resilient Design of Interdependent Water and Energy Systems: A Conceptual Modeling Framework for Tackling Complexities at the Infrastructure-Human-Resource Nexus. *Sustainability* 10, 1845. <https://doi.org/10.3390/su10061845>
- Qiu, R., Xu, W., Zhang, J., Staenz, K., 2018. Modelling and Simulating Urban Residential Land Development in Jiading New City, Shanghai. *Appl. Spat. Anal. Policy* 11, 753–777. <https://doi.org/10.1007/s12061-017-9244-4>
- Whittaker, G., Färe, R., Grosskopf, S., Barnhart, B., Bostian, M., Mueller-Warrant, G., Griffith, S., 2017. Spatial targeting of agri-environmental policy using bilevel evolutionary optimization. *Omega* 66, 15–27. <https://doi.org/10.1016/j.omega.2016.01.007>
- Widener, M.J., Horner, M.W., Ma, K., 2015. Positioning Disaster Relief Teams Given Dynamic Service Demand: A Hybrid Agent-Based and Spatial Optimization Approach: Positioning Relief Teams Given Dynamic Demand. *Trans. GIS* 19, 279–295. <https://doi.org/10.1111/tgis.12092>
- Yuan, M., Liu, Y., He, J., Liu, D., 2014. Regional land-use allocation using a coupled MAS and GA model: from local simulation to global optimization, a case study in Caidian District, Wuhan, China. *Cartogr. Geogr. Inf. Sci.* 41, 363–378. <https://doi.org/10.1080/15230406.2014.931251>
- Zhang, H., Zeng, Y., Jin, X., Shu, B., Zhou, Y., Yang, X., 2016. Simulating multi-objective land use optimization allocation using Multi-agent system—A case study in Changsha, China. *Ecol. Model.* 320, 334–347. <https://doi.org/10.1016/j.ecolmodel.2015.10.017>

Supplementary Material

**SM2 ODD+D protocol of ALABAMA-ABM**

|             |                                           | <b>Guiding questions</b>                                                                          | <b>Our model</b>                                                                                                                                                                                                                                                                                                                                                                                                                                                                                                                                                                                                                                                                                                                                                                                                              |
|-------------|-------------------------------------------|---------------------------------------------------------------------------------------------------|-------------------------------------------------------------------------------------------------------------------------------------------------------------------------------------------------------------------------------------------------------------------------------------------------------------------------------------------------------------------------------------------------------------------------------------------------------------------------------------------------------------------------------------------------------------------------------------------------------------------------------------------------------------------------------------------------------------------------------------------------------------------------------------------------------------------------------|
| I) Overview | I.i Purpose                               | I.i.a What is the purpose of the study?                                                           | Method comparison (ABM vs. multi-objective landscape optimization), analysis of policy instruments and their influence on landscape configurations                                                                                                                                                                                                                                                                                                                                                                                                                                                                                                                                                                                                                                                                            |
|             |                                           | I.i.b For whom is the model designed?                                                             | Scientists                                                                                                                                                                                                                                                                                                                                                                                                                                                                                                                                                                                                                                                                                                                                                                                                                    |
|             | I.ii Entities, state variables and scales | I.ii.a What kinds of entities are in the model?                                                   | Plots, farmers                                                                                                                                                                                                                                                                                                                                                                                                                                                                                                                                                                                                                                                                                                                                                                                                                |
|             |                                           | I.ii.b By what attributes (i.e. state variables and parameters) are these entities characterised? | <b>Farmers:</b> plots owned, total yield from owned plots, income, income threshold<br><b>Plots:</b> location, owner (farmer), soil fertility, proximity to river, land cover (river, intensive grassland or extensive grassland), number of neighbouring extensive plots, profit potential given management options, yield, realized profit/contribution margin (yield + agri-environmental payments)                                                                                                                                                                                                                                                                                                                                                                                                                        |
|             |                                           | I.ii.c What are the exogenous factors / drivers of the model?                                     | Payment levels (payment for extensive grassland, agglomeration bonus, bonus for extensive grassland along river), design of water quality bonus, relative productivity intensive vs extensive grassland, landscape persistence                                                                                                                                                                                                                                                                                                                                                                                                                                                                                                                                                                                                |
|             |                                           | I.ii.d If applicable, how is space included in the model?                                         | GIS (virtual landscape) via raster files                                                                                                                                                                                                                                                                                                                                                                                                                                                                                                                                                                                                                                                                                                                                                                                      |
|             |                                           | I.ii.e What are the temporal and spatial resolutions and extents of the model?                    | Yearly time steps, 100 years, grassland allocation decisions are made once a year; one grid cell represents one plot, model landscape comprises 15x15 cells, up to 10 farms (with randomly assigned plots)                                                                                                                                                                                                                                                                                                                                                                                                                                                                                                                                                                                                                    |
|             | I.iii Process overview and scheduling     | I.iii.a What entity does what, and in what order?                                                 | 1. Initialization: import raster files and translate them into patch attributes; allocate patches (=plots) to farms (randomly selected, same number of plots per farm); calculate income of farms from initial landscape configuration; (optional) set income threshold for each farmer (random from range between average income from initial landscape minus 1 standard deviation to average income plus 3 standard deviations)<br>2. Check income threshold reached: if farmer's income (from last year) is above threshold, no further changes in management of her plots are made<br>3. Potential profit calculation: calculate potential profit for each plot (intensive & extensive) given current land allocation (i.e. other farm's plots as managed in previous year) and including base payment and boni; includes |

|                        |                                           |                                                                                                                                                                                                                                                 |                                                                                                                                                                                                                                                                                                                                                                                                                                                                                                                                                                                                                                                                                                                                                                                                                                                                                                        |
|------------------------|-------------------------------------------|-------------------------------------------------------------------------------------------------------------------------------------------------------------------------------------------------------------------------------------------------|--------------------------------------------------------------------------------------------------------------------------------------------------------------------------------------------------------------------------------------------------------------------------------------------------------------------------------------------------------------------------------------------------------------------------------------------------------------------------------------------------------------------------------------------------------------------------------------------------------------------------------------------------------------------------------------------------------------------------------------------------------------------------------------------------------------------------------------------------------------------------------------------------------|
|                        |                                           |                                                                                                                                                                                                                                                 | <p>a correction for increasing agglomeration bonus by switching neighbouring own plots to extensive</p> <p>4. Allocation: allocate extensive/intensive management to a limited number of plots (given specification of landscape persistence: either a predefined number of randomly selected plots or a predefined number of plots with highest potential for income increase)</p> <p>5. Yield calculation: calculate each plot's yield given allocation</p> <p>6. Agglomeration: check how many neighbouring plots are managed extensively</p> <p>7. Reception of payments: calculate payments received by each plot</p> <p>8. Calculation of income: calculate total yield and income for each farm</p> <p>9. Calculation of agri-environmental payment budget</p> <p>10. Evaluate ecosystem services (ES): translate landscape configuration into ES realizations (R models) [after 100 ticks]</p> |
| II)<br>Design Concepts | II.i Theoretical and Empirical Background | II.i.a Which general concepts, theories or hypotheses are underlying the model's design at the system level or at the level(s) of the submodel(s) (apart from the decision model)? What is the link to complexity and the purpose of the model? | It's a relatively simple model trying to show that for heterogeneous landscapes, you need spatially differentiated incentives. The farmers' behaviour is boundedly rational in a very simple sense (income threshold).                                                                                                                                                                                                                                                                                                                                                                                                                                                                                                                                                                                                                                                                                 |
|                        |                                           | II.i.b On what assumptions is/are the agents' decision model(s) based?                                                                                                                                                                          | Simple microeconomic model with minimal bounded rationality (satisficing): below threshold income maximizing, myopic farmers; above threshold continuation of last chosen strategy (i.e. management allocation pattern).                                                                                                                                                                                                                                                                                                                                                                                                                                                                                                                                                                                                                                                                               |
|                        |                                           | II.i.c Why is a/are certain decision model(s) chosen?                                                                                                                                                                                           | Simplicity.                                                                                                                                                                                                                                                                                                                                                                                                                                                                                                                                                                                                                                                                                                                                                                                                                                                                                            |
|                        |                                           | II.i.d If the model / a submodel (e.g. the decision model) is based on empirical data, where does the data come from?                                                                                                                           | NA                                                                                                                                                                                                                                                                                                                                                                                                                                                                                                                                                                                                                                                                                                                                                                                                                                                                                                     |
|                        |                                           | II.i.e At which level of aggregation were the data available?                                                                                                                                                                                   | NA                                                                                                                                                                                                                                                                                                                                                                                                                                                                                                                                                                                                                                                                                                                                                                                                                                                                                                     |

Supplementary Material

|                                                           |                                                                                                                                                                          |                                                                                                                                                                |
|-----------------------------------------------------------|--------------------------------------------------------------------------------------------------------------------------------------------------------------------------|----------------------------------------------------------------------------------------------------------------------------------------------------------------|
| II.ii Individual Decision Making                          | II.ii.a What are the subjects and objects of decision-making? On which level of aggregation is decision-making modeled? Are multiple levels of decision making included? | Subjects: farmers / Objects: management (extensive or intensive grassland) on plot level<br>Farmers decide on plot-level                                       |
|                                                           | II.ii.b What is the basic rationality behind agents' decision-making in the model? Do agents pursue an explicit objective or have other success criteria?                | Income maximization up to threshold                                                                                                                            |
|                                                           | II.ii.c How do agents make their decisions?                                                                                                                              | Income function                                                                                                                                                |
|                                                           | II.ii.d Do the agents adapt their behavior to changing endogenous and exogenous state variables? And if yes, how?                                                        | NA                                                                                                                                                             |
|                                                           | II.ii.e Do social norms or cultural values play a role in the decision-making process?                                                                                   | NA                                                                                                                                                             |
|                                                           | II.ii.f Do spatial aspects play a role in the decision process?                                                                                                          | Agglomeration bonus and bonus for extensive grassland in proximity to river depend on spatial patterns (and play a role in farmers' decisions)                 |
|                                                           | II.ii.g Do temporal aspects play a role in the decision process?                                                                                                         | NA                                                                                                                                                             |
|                                                           | II.ii.h To which extent and how is uncertainty included in the agents' decision rules?                                                                                   | Agents do not know how other agents will decide in the current period, they only know the allocation in the last period                                        |
|                                                           | II.iii Learning                                                                                                                                                          | II.iii.a Is individual learning included in the decision process? How do individuals change their decision rules over time as consequence of their experience? |
| II.iii.b Is collective learning implemented in the model? |                                                                                                                                                                          | NA                                                                                                                                                             |
| II.iv Individual Sensing                                  | II.iv.a What endogenous and exogenous state variables are individuals assumed to sense and consider in their decisions? Is the sensing process erroneous?                | Payment rates, soil fertility, land-use allocation in last period; no errors                                                                                   |
|                                                           | II.iv.b What state variables of which other individuals can an individual perceive? Is the sensing process erroneous?                                                    | Land-use allocation in last period; no errors                                                                                                                  |

|                            |                                                                                                                                                                                                       |                                                                                                                                                  |
|----------------------------|-------------------------------------------------------------------------------------------------------------------------------------------------------------------------------------------------------|--------------------------------------------------------------------------------------------------------------------------------------------------|
|                            | II.iv.c What is the spatial scale of sensing?                                                                                                                                                         | Local (neighbouring plots)                                                                                                                       |
|                            | II.iv.d Are the mechanisms by which agents obtain information modeled explicitly, or are individuals simply assumed to know these variables?                                                          | Not modelled.                                                                                                                                    |
|                            | II.iv.e Are costs for cognition and costs for gathering information included in the model?                                                                                                            | Not explicitly; implicitly, cognitive burden is the reason for income threshold beyond which farmers cease to make new decisions                 |
| II.v Individual Prediction | II.v.a Which data uses the agent to predict future conditions?                                                                                                                                        | Extrapolation from last period                                                                                                                   |
|                            | II.v.b What internal models are agents assumed to use to estimate future conditions or consequences of their decisions?                                                                               | NA                                                                                                                                               |
|                            | II.v.c Might agents be erroneous in the prediction process, and how is it implemented?                                                                                                                | Since they only consider neighbouring plots, they cannot take into account reactions of other farmers to changes in land allocation farther away |
| II.vi Interaction          | II.vi.a Are interactions among agents and entities assumed as direct or indirect?                                                                                                                     | Indirect                                                                                                                                         |
|                            | II.vi.b On what do the interactions depend?                                                                                                                                                           | Spatial distances (neighborhood)                                                                                                                 |
|                            | II.vi.c If the interactions involve communication, how are such communications represented?                                                                                                           | NA                                                                                                                                               |
|                            | II.vi.d If a coordination network exists, how does it affect the agent behaviour? Is the structure of the network imposed or emergent?                                                                | NA                                                                                                                                               |
| II.vii Collectives         | II.vii.a Do the individuals form or belong to aggregations that affect, and are affected by, the individuals? Are these aggregations imposed by the modeller or do they emerge during the simulation? | NA                                                                                                                                               |
|                            | II.vii.b How are collectives represented?                                                                                                                                                             | NA                                                                                                                                               |

Supplementary Material

|                          |                          |                                                                                                                                               |                                                                                                                                                                                                                                                                                                                                                                             |                                                                                                                                                                                                                                                                                            |
|--------------------------|--------------------------|-----------------------------------------------------------------------------------------------------------------------------------------------|-----------------------------------------------------------------------------------------------------------------------------------------------------------------------------------------------------------------------------------------------------------------------------------------------------------------------------------------------------------------------------|--------------------------------------------------------------------------------------------------------------------------------------------------------------------------------------------------------------------------------------------------------------------------------------------|
|                          | II.viii<br>Heterogeneity | II.viii.a Are the agents heterogeneous? If yes, which state variables and/or processes differ between the agents?                             | In one variant of the model (where BOUNDED-RATIONALITY = “heterogeneity”), they have different income thresholds.                                                                                                                                                                                                                                                           |                                                                                                                                                                                                                                                                                            |
|                          |                          | II.viii.b Are the agents heterogeneous in their decision-making? If yes, which decision models or decision objects differ between the agents? | See above.                                                                                                                                                                                                                                                                                                                                                                  |                                                                                                                                                                                                                                                                                            |
|                          | II.ix<br>Stochasticity   | II.ix.a What processes (including initialization) are modeled by assuming they are random or partly random?                                   | Farmers’ income thresholds are generated randomly. Also, the assignment of plots to farmers is random. In one model variant (where PERSISTENCE = “random”), the plots on which farmers are allowed to change management in each period are chosen randomly.                                                                                                                 |                                                                                                                                                                                                                                                                                            |
|                          | II.x<br>Observation      | II.x.a What data are collected from the ABM for testing, understanding, and analyzing it, and how and when are they collected?                | The land-use allocation is translated in a measure of biodiversity (based on configuration of extensive grassland plots) and water quality (based on proximity of extensive/intensive grassland plots from river); grass production is calculated by summing the production of each plot; also, the budget needed to finance the agri-environmental payments is calculated. |                                                                                                                                                                                                                                                                                            |
|                          |                          | II.x.b What key results, outputs or characteristics of the model are emerging from the individuals? (Emergence)                               | Landscape pattern                                                                                                                                                                                                                                                                                                                                                           |                                                                                                                                                                                                                                                                                            |
|                          | III<br>Details           | II.i<br>Implementation<br>Details                                                                                                             | III.i.a How has the model been implemented?                                                                                                                                                                                                                                                                                                                                 | Windows 10, Netlogo 6.0.4, R 3.5.1                                                                                                                                                                                                                                                         |
|                          |                          |                                                                                                                                               | III.i.b Is the model accessible and if so where?                                                                                                                                                                                                                                                                                                                            | <a href="https://www.comses.net/codebases/44a79797-0af7-4df2-8a6c-4f68caa25d3c/releases/1.0.0/">https://www.comses.net/codebases/44a79797-0af7-4df2-8a6c-4f68caa25d3c/releases/1.0.0/</a><br><a href="https://github.com/BartoszBartk/magenta">https://github.com/BartoszBartk/magenta</a> |
|                          |                          | III.ii<br>Initialization                                                                                                                      | III.ii.a What is the initial state of the model world, i.e. at time t=0 of a simulation run?                                                                                                                                                                                                                                                                                | Landscape imported from raster files (allocation pattern of management + soil fertility gradient), 10 farmers with randomly distributed plots and (variant) randomly assigned income thresholds.                                                                                           |
|                          |                          |                                                                                                                                               | III.ii.b Is initialization always the same, or is it allowed to vary among simulations?                                                                                                                                                                                                                                                                                     | Distribution of plots among farmers is random, and has limited influence on results. Income thresholds are always dependent on mean income from initialized landscape, and as such vary among simulations.                                                                                 |
|                          |                          |                                                                                                                                               | III.ii.c Are the initial values chosen arbitrarily or based on data?                                                                                                                                                                                                                                                                                                        | Arbitrarily.                                                                                                                                                                                                                                                                               |
| III.iii<br>Input<br>Data |                          | III.iii.a Does the model use input from external sources such as data files or other                                                          | Landscape (raster files): soil fertility distribution (Gaussian), sinusoidal river along east–west axis                                                                                                                                                                                                                                                                     |                                                                                                                                                                                                                                                                                            |



|  |                     |                                                                                                                       |                                                                                                                              |
|--|---------------------|-----------------------------------------------------------------------------------------------------------------------|------------------------------------------------------------------------------------------------------------------------------|
|  |                     | models to represent processes that change over time?                                                                  |                                                                                                                              |
|  | III.iv<br>Submodels | III.iv.a What, in detail, are the submodels that represent the processes listed in ‘Process overview and scheduling’? | R models: yield model, habitat index model, water quality model<br>NetLogo submodels: bonus calculation, budget calculation. |
|  |                     | III.iv.b What are the model parameters, their dimensions and reference values?                                        | See table below.                                                                                                             |
|  |                     | III.iv.c How were submodels designed or chosen, and how were they parameterized and then tested?                      | Based on literature, highly stylized (see below).                                                                            |

### Submodels

- Agricultural yield (AY) modelled as a function of production intensity level  $P$  (with the value of 1.5 for extensive grassland and 2 for intensive grassland) and soil fertility  $F$ , summarized over all 200 grassland grid cells  $i$ :
$$AY = \frac{\sum_{i=1}^{200} \sqrt{P_i(1+F_i)} - 296.8974}{45.9032}$$
AY is normalized to range between 0 (all extensive) and 1 (all intensive). Within NetLogo, an analogous yield model is used for each grassland plot, without normalization.
- Habitat index (HI) was estimated as total area of the two largest patches of extensive grassland ( $A_{2X}$ ) divided by 200 (i.e. the number of grassland cells):
$$HI = \frac{A_{2X}}{200},$$
assuming that both increasing extent and connectivity of extensive grassland is beneficial for biodiversity. Patches were defined as contiguous extensive grassland cells using the 4-neighbor rule (von Neumann neighbourhood). HI can range between 0 (all intensive) and 1 (all extensive).
- Water quality (WQ) was a function of Euclidean distance ( $D$ ) of intensive grassland cells  $i$  to their respective closest river cells:
$$WQ = 1 - \frac{\sum_{i=1}^I \frac{1}{D_i}}{0.8635082} \text{ if } I > 0 \text{ or } WQ = 1 \text{ if } I = 0$$
where  $I$  is the total number of intensive grassland cells. Decreasing the number of intensive grassland cells and/or increasing their distances to the river would thus increase WQ, which is normalized to range between 0 (all intensive) and 1 (all extensive).
- Agglomeration bonus is calculated by multiplying the bonus level with the share of extensive neighbouring plots.
- Water quality bonus is normally extended if the plot is within a predefined proximity to river (see parameter DIST) or (optionally, mainly for testing purposes) by a function following the WQ function.

### Parameters

| Parameter                                                  | Name in NetLogo model | Values/range               |
|------------------------------------------------------------|-----------------------|----------------------------|
| Persistence                                                | persistence           | “random”, “profit”         |
| Limit of changeable plots per period per farmer            | change-lim            | 1–20                       |
| Rationality type                                           | bounded-rationality?  | TRUE, FALSE                |
| Income threshold type (only if bounded-rationality = TRUE) | bounded-threshold     | “heterogeneity”, “uniform” |
| Type of water bonus                                        | water-bonus           | “simple”, “as ES model”    |
| Number of agents                                           | no-agents             | 1–10                       |
| Base payment level                                         | base-p                | 0–0.25                     |

## Supplementary Material

|                                                                |               |         |
|----------------------------------------------------------------|---------------|---------|
| Agglomeration bonus level                                      | bonus-agg     | 0-0.25  |
| Water quality bonus                                            | bonus-wat     | 0-0.25  |
| Distance from river of plots rewarded with water quality bonus | dist          | 0, 1, 2 |
| Income threshold of each agent                                 | income-thresh | random  |

### SM3 Further results of the virtual case study

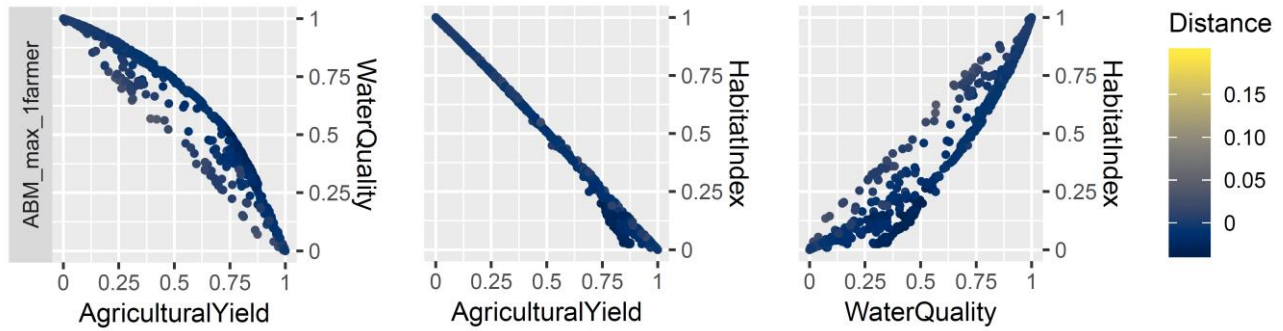

Figure S3.1: Non-dominated solutions based on the ABM\_max\_1farmer simulations and their distance to CoMOLA. Note that the 3D solution space is shown in three 2D scatterplots. Distance refers to the Euclidean distance to the respective closest non-dominated solution of CoMOLA. The colour bar is based on the full range of distances across all tested ABM variants. The variant shown here (ABM\_max\_1farmer) is the ABM variant with only one farmer and a water quality bonus function following the WQ model (Eq. 3 in the paper) and was thus supposed to “emulate” CoMOLA. The dominance of dark bluish colours (distance close to 0) and the hypervolume (HV) of 0.41 indicates that the solutions are indeed very similar to those generated by CoMOLA (which had an HV value of 0.42); see Table 2 in the paper.

Supplementary Material

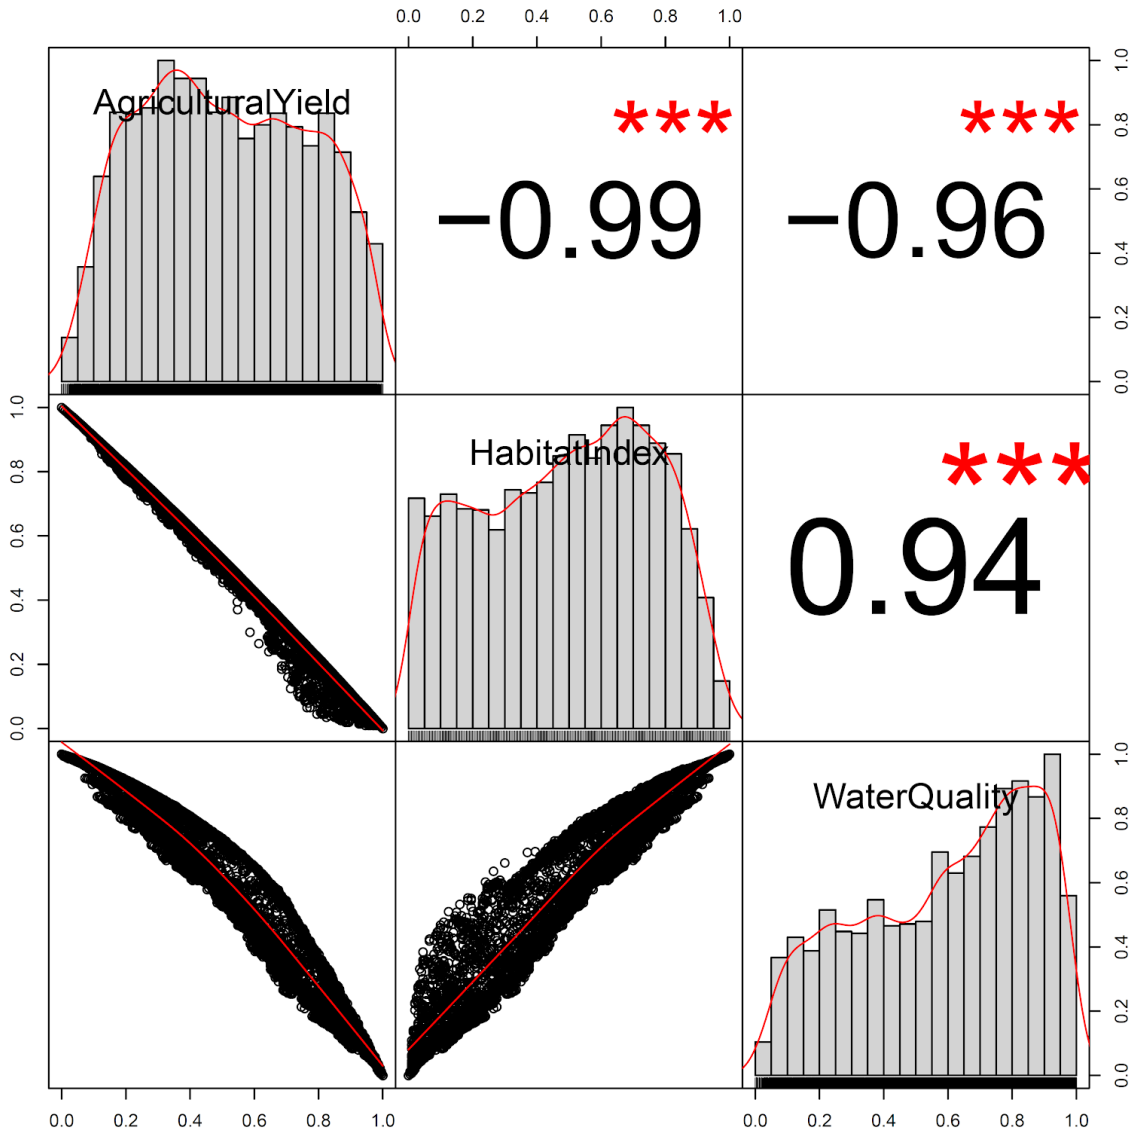

Figure S3.2: Pearson correlation plot for CoMOLA's set of Pareto-optimal solutions. The histograms show the distribution of values for each ES indicator; the numbers indicate the Pearson correlation coefficients for each pair of ES indicators.

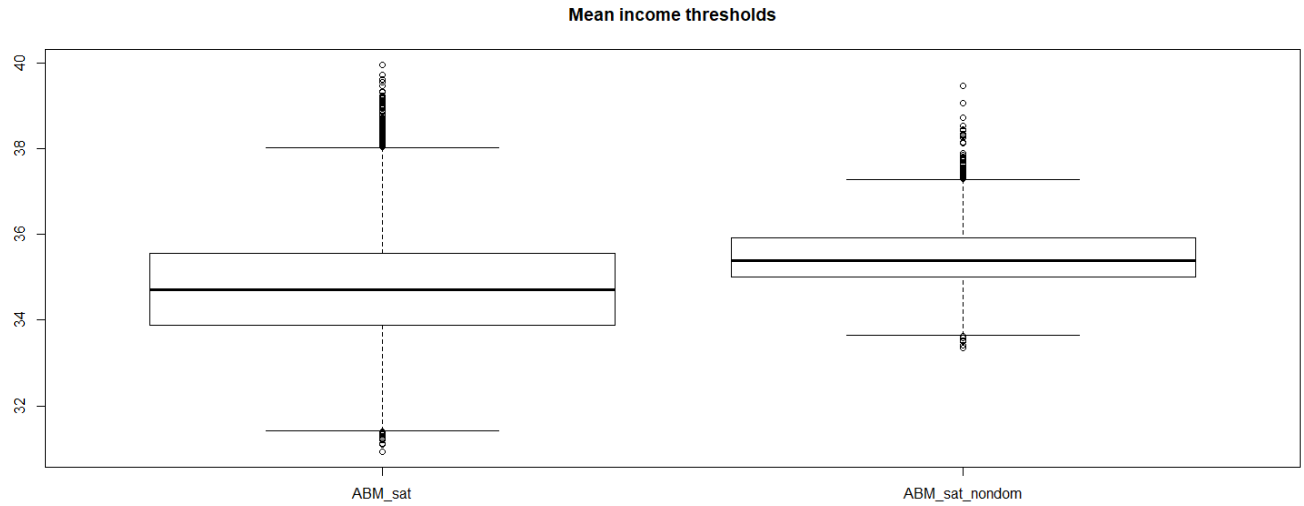

Figure S3.3: Comparison of mean income thresholds between all runs of the satisficing ABM variant (ABM\_sat) vs. only non-dominated ones (ABM\_sat\_nondom).

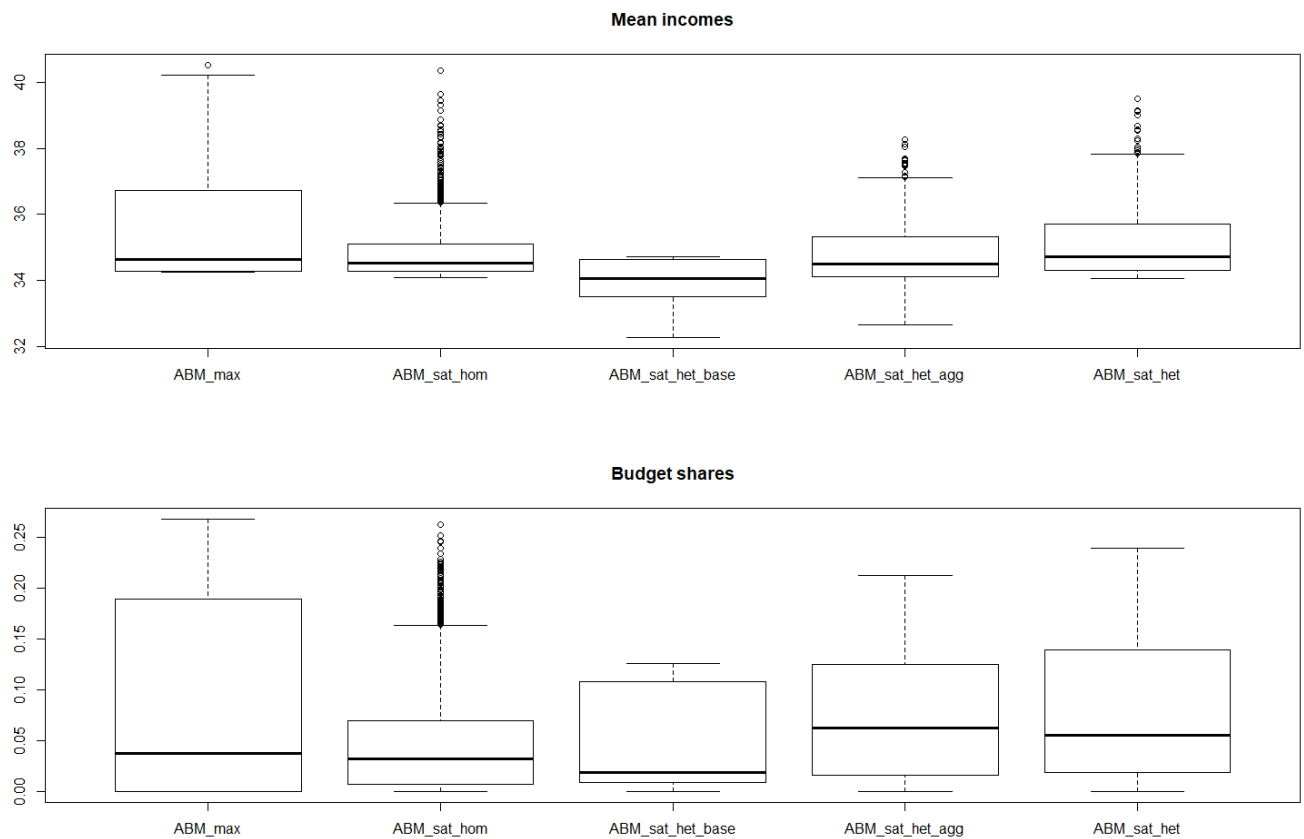

Figure S3.4: Comparison of mean incomes and budget shares (share of total budget for agri-environmental payments in total incomes) across all analysed ABM variants. Only Pareto-optimal solutions from each model variant are included.

## Supplementary Material

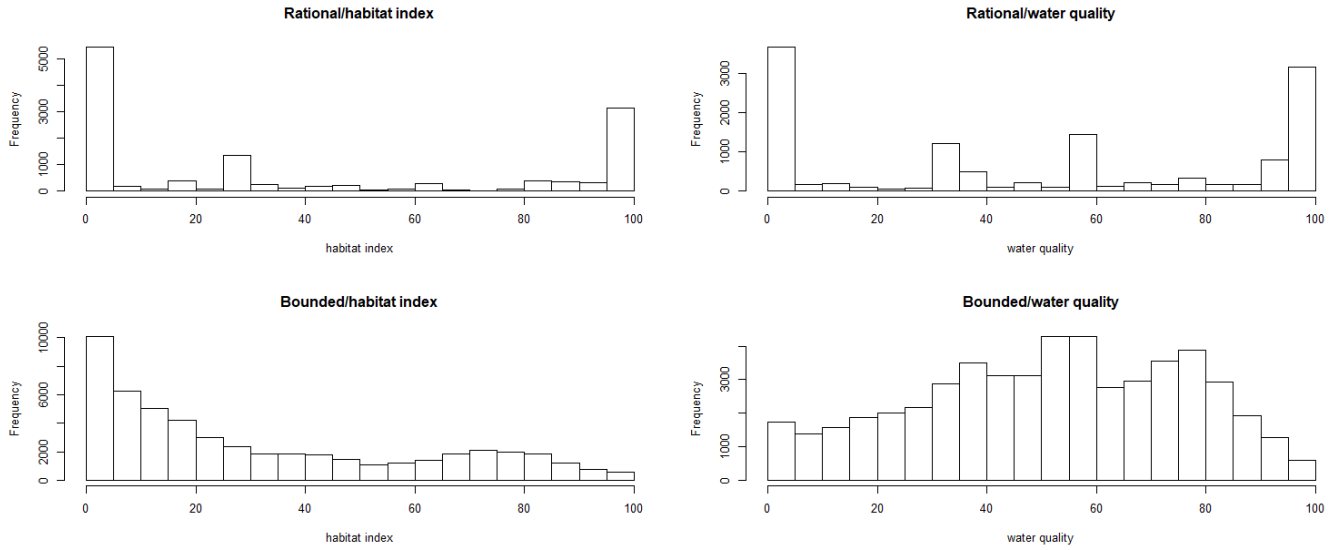

Figure S3.5: Comparison of distribution of solutions with various levels of ecosystem service provision (left: habitat index; right: water quality) between rational maximizers (top) and boundedly rational satisficers (bottom).
